# Supplementary material for: Dengue virus NS5 degrades ERC1 during infection to antagonize NF-kB activation
Source: PubMed Central journal article supplement — Proc Natl Acad Sci U S A. 2023 May 30;120(23):e2220005120. doi: 10.1073/pnas.2220005120 (PMC10266027; doi:10.1073/pnas.2220005120), 2023-05-30
Supplement: pnas.2220005120.sapp.pdf [file pnas.2220005120.sapp.pdf]

1 Supplemental information

2

S1

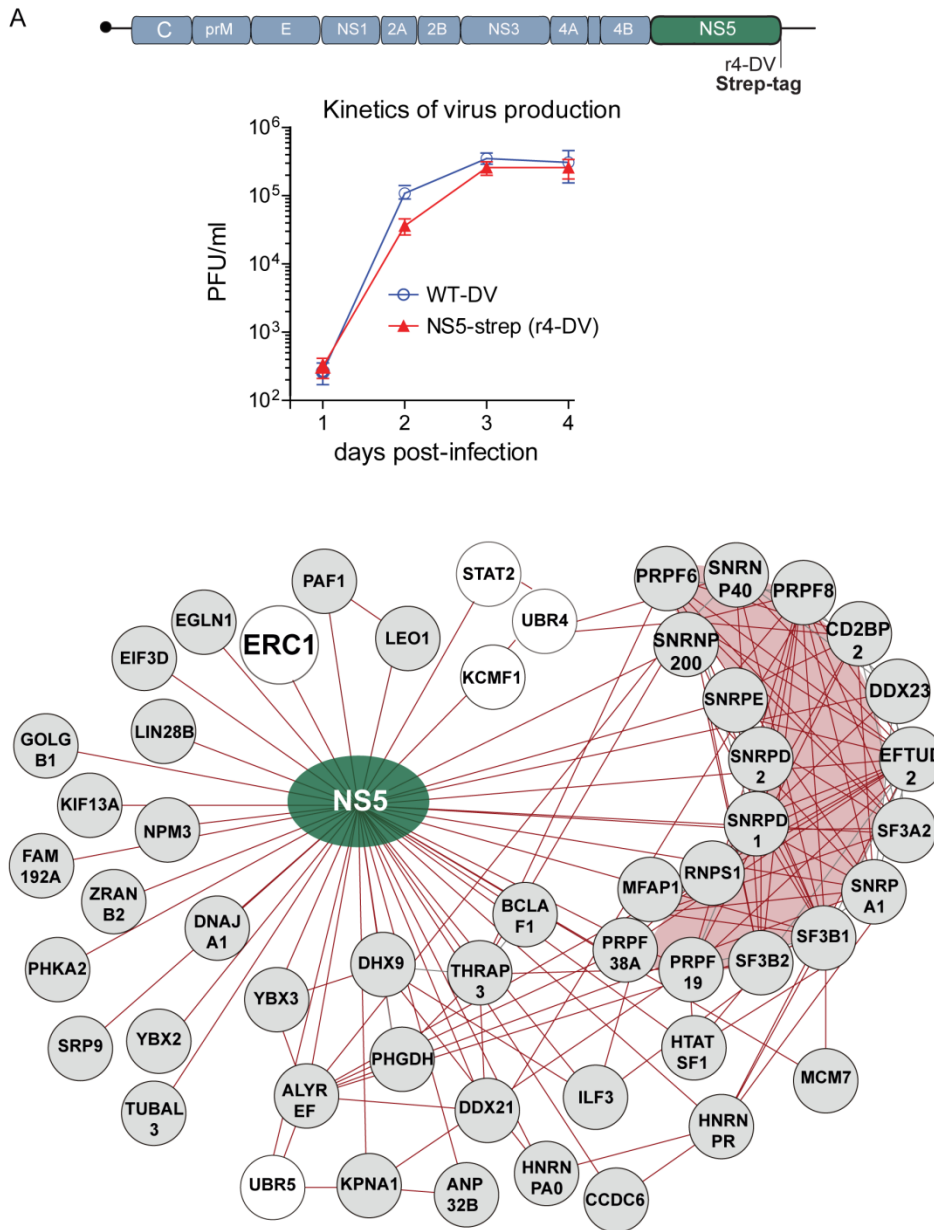

3

4 **Figure S1. NS5 host protein interactions during DENV infection**

5 (A) Representation of a recombinant DENV2 with a Strep-tag fused to NS5 (r4-DV) and

6 replication kinetics comparing it with the WT DENV2. (B) DENV2 NS5-host proteins interaction

7 network.

Figure S2

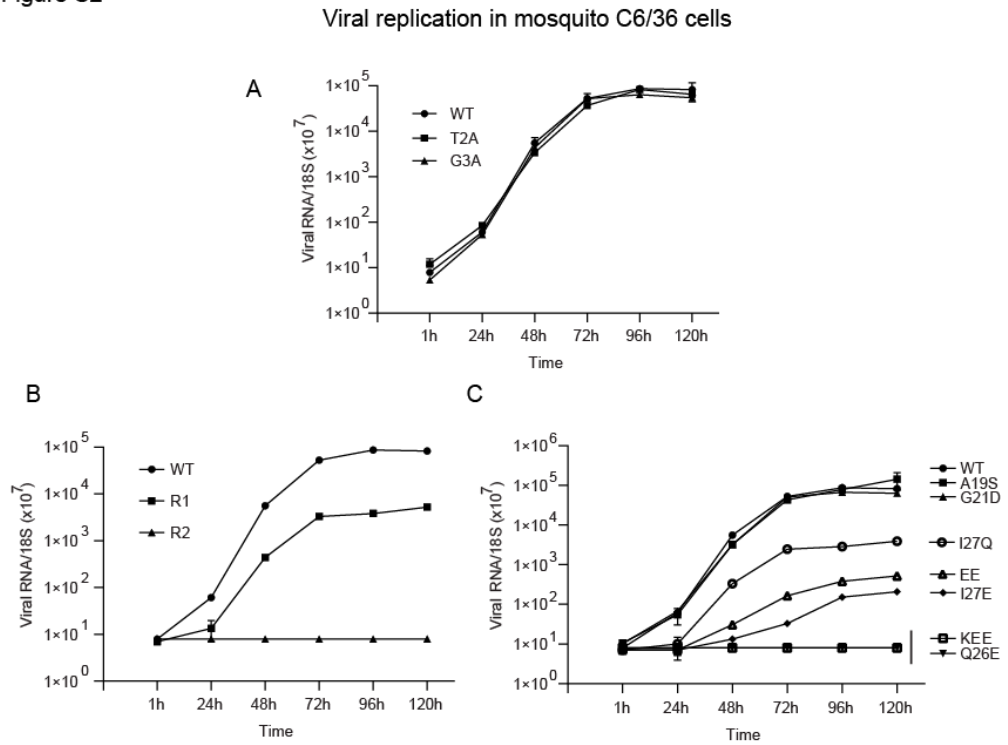

8

9

10 **Figure S2. Viral replication in mosquito cell line C6/36**

11 (A) Viral replication of DENV2 WT, T2A and G3A viruses as a function of time (MOI:1).  
12 Intracellular viral RNA levels relative to 18S measured by RT qPCR. (B) Viral replication of  
13 DENV2 WT, chimeric R1 and R2 viruses is shown. RT qPCR of intracellular viral RNA relative to  
14 18S (MOI:1). (C) Replication levels of viruses carrying one or a combination of point mutations in  
15 R1 region is shown as a function of time (MOI: 1).

Figure S3

Viral replication in human A549 cells

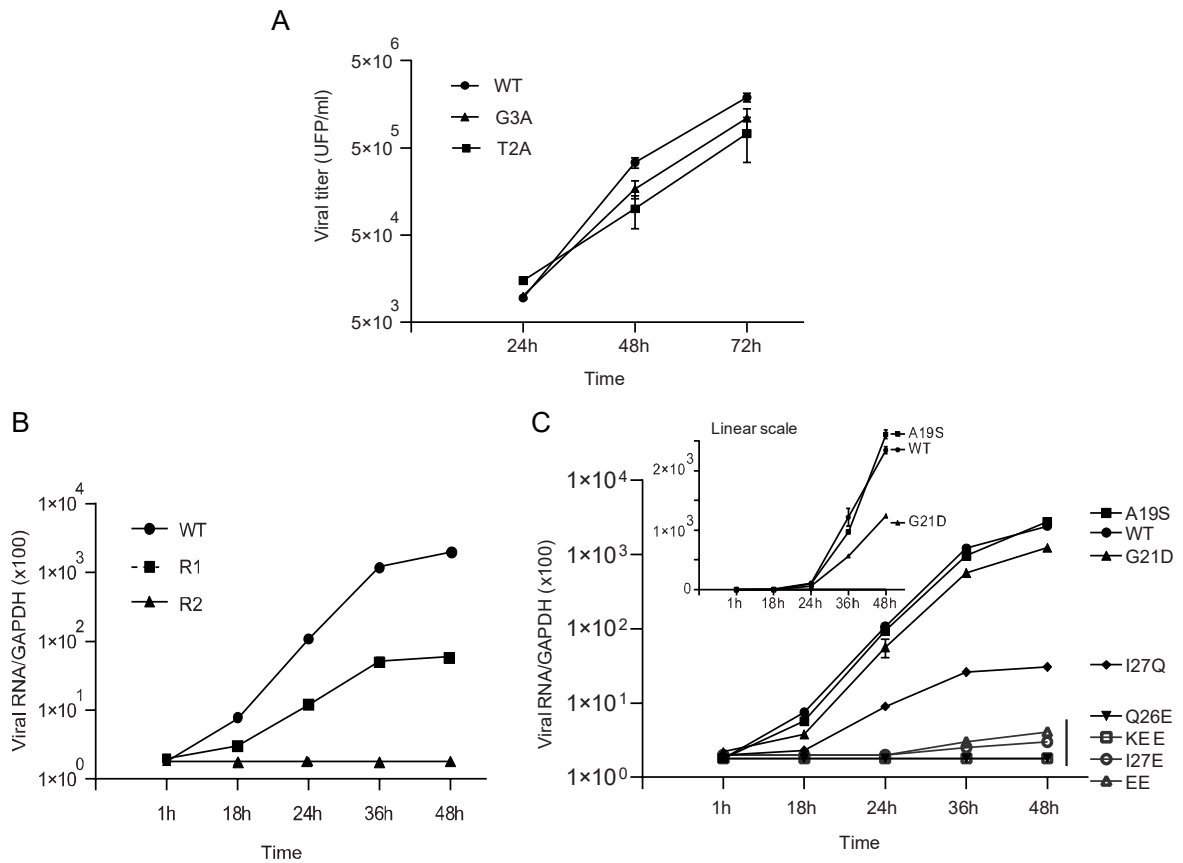

16

17

18 **Figure S3. Viral replication in human cell line A549**

19 (A) Viral replication of DENV2 WT, T2A and G3A viruses as a function of time in A549 cells  
 20 (MOI:0.01). Plaque assay of infectious viral particles in the supernatant of infected A549 cells  
 21 (PFU: plaque forming units). (B) Viral replication DENV2 WT, chimeric R1 and R2 viruses relative  
 22 to GAPDH measured by RT qPCR (MOI:1). (C) Viral replication of viruses carrying one or a  
 23 combination of point mutations in R1 region is shown as a function of time (MOI:1). RT qPCR of  
 24 intracellular viral ARN relative to GAPDH.

25

26

27

28

Figure S4

Kinetics of STAT2 and ERC1 degradation as a function of time after DENV WT and T2A infection

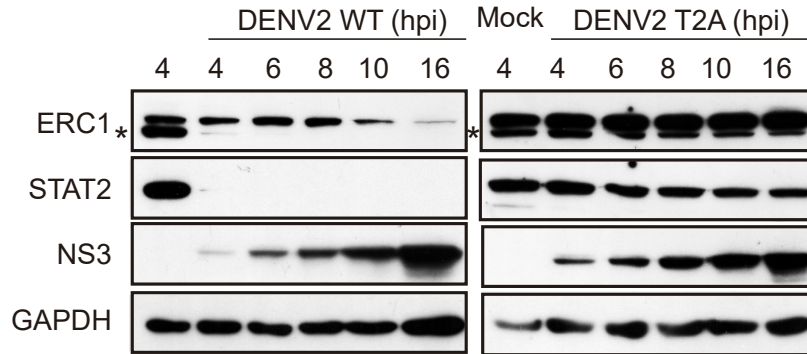

29

30

31 **Figure S4. Kinetics of STAT2 and ERC1 degradation upon infection with DENV2 WT and**  
32 **T2A viruses**

33 (A) Levels of STAT2 and ERC1 proteins as a function of time in cells infected with DENV2 WT or  
34 T2A. A549 cells were infected with an MOI of 10 during 4, 6, 8, 10 or 12 hours and lysed for  
35 analyses. ERC1, STAT2, viral NS3 to assessed infection and GAPDH control are shown on the  
36 left. STAT2 protein was blot before ERC1 and therefore, STAT2 can still be detected (indicated  
37 with \* below ERC1)

38

39

40 **Table 1. Primers used to introduce mutations in the DENV2 infectious clone**

| <b>Viral mutant</b> | <b>Name</b>          | <b>Sequence</b>                                                                                  |
|---------------------|----------------------|--------------------------------------------------------------------------------------------------|
| Forward             | AVG1320              | CGGAGACCCTGGAGACATTG                                                                             |
| Reverse             | AVG 1323             | CTGCGGTGTCATCGGCATAC                                                                             |
| T2A                 | AVG2363<br>AVG2364   | CGTCTCTCCTATGTTGCCAGCTCCCCTTCTTGT<br>GGAGCTGGCAACATAGGAGAGACGCTTGGAGA                            |
| G3A                 | AVG2365<br>AVG2366   | CGTCTCTCCTATGTTGCCAGTTCCCCTTCTTGT<br>GGAAGTGCACATAGGAGAGACGCTTGGAGA                              |
| R1                  | AVG2363<br>AVG2364   | CGTCTCTCCTATGTTGCCAGCTCCCCTTCTTGT<br>GGAGCTGGCAACATAGGAGAGACGCTTGGAGA                            |
| R2                  | AVG2385<br>AVG2382   | TTTAGACCCATCTTTCAGGGCAGATTTTGCTAAGGTTCTATCCACTTCC<br>TCTGCCCTGAAAGATGGGTCTAAAGACCATCACGCTGTGTCTG |
| A19S                | AVG 2447<br>AVG 2446 | TAATGAGTTTAGCTGTCTTTTCCATTCTCTCCAAGCGTCTCT<br>AGACAGCTAAACTCATTAGGAAAAAGTGAATTCCAGATCTACAAGAAAAG |
| G21D                | AVG 2465<br>AVG 2464 | AATTCACTTTTGTCCAATGCGTTCAATCGG<br>TGAACGCATTGGACAAAAGTGAATTCC                                    |
| Q26E                | AVG 2467<br>AVG 2466 | CACTTTTCTTGTAGATTTTGAATTCACCTTTTTTCCC<br>GAAAAAGTGAATTCGAAATCTACAAGAAAAGTGG                      |
| I27E                | AVG 2469<br>AVG 2468 | CCACTTTTCTTGTACTCCTGGAATTCACCTTTTTTC<br>GTGAATTCAGGAGTACAAGAAAAGTGAATC                           |
| I27Q                | AVG 2471<br>AVG 2470 | CCACTTTTCTTGTACTGCTGGAATTCACCTTTTTTC<br>GTGAATTCAGCAGTACAAGAAAAGTGAATC                           |
| KEE                 | AVG 2473<br>AVG 2472 | GGATTCCACTTTTTCTTGTACTCTTGAATTCCTTTTTTCCCAATGCG<br>CGCATTGGGAAAAAAGAATTCGAAGAGTACAAGAAAAGTGAATCC |
| EE                  | AVG 2475<br>AVG 2474 | GGATTCCACTTTTTCTTGTACTCTTGAATTCACCTTTTTTCC<br>GAAAAAGTGAATTCGAAGAGTACAAGAAAAGTGAATCC             |

41

42

43 **Table 2. Primers used to obtain viral protein expression plasmids**

| <b>Name</b> | <b>Sequence</b>                                                                                    |
|-------------|----------------------------------------------------------------------------------------------------|
| AVG2<br>375 | CCCTCGAGGGACCTGGAGCCACGAACTTCTCTCTGTTAAAGCAAGCAGGAGATGTTGAAGAAAACCCCG<br>GGCCTGTGAGCAAGGGCGAGGAGCT |
| AVG2<br>376 | ATGGGCCCTTGTACAGCTCGTCCATGC                                                                        |
| AVG2<br>375 | CCCTCGAGGGACCTGGAGCCACGAACTTCTCTCTGTTAAAGCAAGCAGGAGATGTTGAAGAAAACCCCG<br>GGCCTGTGAGCAAGGGCGAGGAGCT |
| AVG2<br>377 | ATCTCGAGTTACTTGTACAGCTCGTCCATGC                                                                    |
| AVG2<br>269 | CCGGTACCATGGGAACTGGGACCACAGGAGAGACTGG                                                              |
| AVG2<br>270 | ATCTCGAGCGTTCCTGCCCAAGATCTACGTCCTTC                                                                |
| AVG2<br>380 | CGCAAATGGGCGGTAGGCGTG                                                                              |
| AVG2<br>384 | CTCTTCAAACCTTTTTCTGTCTAATGAGTTAGCTGTCTTTCCATTTCTCTCCAAGCGTCTCT                                     |
| AVG2<br>381 | AGACAGCTAAACTCATTAGACAGAAAAGAGTTTGAAGAGTACAAGAAAAGTGAATCCAGGAAGTGG                                 |
| AVG2<br>387 | CTCGAGCCACAGAACTCCTGCTTCTTCTCTTCTC                                                                 |
| AVG2<br>385 | TTTAGACCCATCTTTCAGGGCAGATTTTGCTAAGGTTCTATCCACTTCC                                                  |
| AVG2<br>382 | TCTGCCCTGAAAGATGGGTCTAAAGACCATCACGCTGTGTGCG                                                        |
| AVG2<br>386 | TTCAGGTTTTGAAGACAACCAATTTTCTACTAAGTTAAGGACTC                                                       |
| AVG2<br>383 | TCTTCAAAACCTGAATTTTGCATAAAGGTTCTCAACCC                                                             |

44

45

46

47

48

49

50

51

52

53

54

55

| Name                              | Sequence                |
|-----------------------------------|-------------------------|
| Aedes albopictus 18S Forward qPCR | GTGCATGGCCGTTCTTAGTTG   |
| Aedes albopictus 18S Reverse qPCR | CGAACCGTCGGTATCAAACATC  |
| DENV Forward qPCR                 | ACAAGTCGAACAACCTGGTCCAT |
| DENV Reverse qPCR                 | GCCGCACCATTGGTCTTCTC    |
| human ERC1 Forward qPCR           | GGAATCAGCCAGGACCAATGCT  |
| human ERC1 Reverse qPCR           | CCTTTTCTGCCAGAGACTGCTG  |
| human GAPDH Forward qPCR          | ACAACCTTTGGTATCGTGGAAGG |
| human GAPDH Reverse qPCR          | TATTTGGCAGGTTTTTCTAGACG |
| human IFN $\beta$ Forward qPCR    | TCTGGCACAACAGGTAGTAGGC  |
| human IFN $\beta$ Reverse qPCR    | GAGAAGCACAACAGGAGAGCAA  |
| human IL6 Forward qPCR            | AGAGGCACTGGCAGAAAACAAC  |
| human IL6 Reverse qPCR            | AGGCAAGTCTCCTCATTGAATCC |
| human TNF $\alpha$ Forward qPCR   | TCAGCTTGAGGGTTTGCTAC    |
| human TNF $\alpha$ Reverse qPCR   | TGCACTTTGGAGTGATCGG     |
| human UBR4 Forward qPCR           | GGTGTTCAGAGGCTAGTGATC   |
| human UBR4 Reverse qPCR           | CCAAGTCTTCTGCGGTTCTT    |
